# Supplementary material for: Technical note: On seasonal variability of the M 2 tide
Source: Copernicus journal article supplement (doi:10.5194/os-18-1073-2022), 2022-07-19
Supplement: Supplementary file 1 [file os-18-1073-2022-supplement.zip]

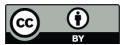

## *Supplement of*

## **Technical note: On seasonal variability of the $M_2$ tide**

**Richard D. Ray**

*Correspondence to:* Richard D. Ray ([richard.ray@nasa.gov](mailto:richard.ray@nasa.gov))

- `os-18-1073-2022-supplement-title-page.pdf`
- `supplement`
  - `harmonics_Chittagong.txt`
  - `harmonics_PortOrford.txt`
  - `harmonics_SaintMalo.txt`
  - `readme`

The copyright of individual parts of the supplement might differ from the article licence.
