# Supplementary material for: Technical note: On seasonal variability of the M 2 tide
Source: Copernicus journal article supplement (doi:10.5194/os-18-1073-2022), 2022-07-19
Supplement: Supplementary file 2 [file os-18-1073-2022-supplement.zip]

Archive with 6 entries (5 files):
- os-18-1073-2022-supplement-title-page.pdf
- supplement/
- supplement/harmonics_PortOrford.txt
- supplement/readme
- supplement/harmonics_SaintMalo.txt
- supplement/harmonics_Chittagong.txt
