# Supplementary material for: Technical note: On seasonal variability of the M 2 tide
Source: Copernicus journal article supplement (doi:10.5194/os-18-1073-2022), 2022-07-19
Supplement: Supplementary file 2 [file os-18-1073-2022-supplement.zip › supplement/harmonics_Chittagong.txt]

Tide     Doodson no.    Amp (cm)   Phase_lag   std err (cm)
Sa         056.5555      33.997     131.44      0.894
Ssa        057.5555       4.002     173.56      1.282
MSm        063.6555       2.143       8.57      0.402
Mm         065.4555       2.142      14.68      0.145
MSf        073.5555       6.399      24.86      0.487
Mf         075.5555       2.248       4.10      0.157
sig1       127.5558       0.980     356.91      0.102
Q1         135.6558       0.674     263.64      0.130
O1         145.5558       8.187     264.71      0.186
MS1        146.5557       0.912     195.29      0.171
MP1        147.5556       1.983       6.23      0.163
M1'        155.5557       0.545     206.55      0.097
M1         155.6556       0.582     330.27      0.112
chi1       157.4556       0.359     191.99      0.121
pi1        162.5568       0.340     354.25      0.111
P1         163.5558       5.811     280.61      0.113
S1         164.5557       2.141      50.01      0.113
K1         165.5556      18.770     277.94      0.108
psi1       166.5546       0.456      55.49      0.106
phi1       167.5556       0.458     304.07      0.103
the1       173.6556       0.504     275.23      0.101
J1         175.4556       0.663     309.90      0.101
SO1        183.5556       1.747      87.12      0.149
OO1        185.5556       0.537     266.60      0.148
2NS2       217.7555       1.140     324.07      0.264
3MS2       219.5555       3.200     154.82      0.253
MNK2       225.6555       1.649     351.70      0.378
eps2       227.6555       4.161     357.87      0.354
2MK2       235.5555       4.340      14.26      0.336
2N2        235.7555       4.534     161.87      0.314
mu2        237.5555      12.516      17.00      0.308
NA2        244.6555       2.858      26.77      0.264
N2         245.6555      32.826     181.75      0.306
NB2        246.6555       1.495     305.59      0.318
nu2        247.4555       9.918     188.00      0.319
MSK2       253.5555       1.610     204.84      0.421
MA2        254.5555      15.494      50.24      0.354
M2         255.5555     171.787     195.97      0.344
MB2        256.5555      10.168     322.91      0.343
del2       257.5555       0.814     317.44      0.236
lam2       263.6557       5.686     225.74      0.282
LA2        264.4557       0.847      69.95      0.286
L2         265.4557      10.889     213.15      0.266
LB2        266.4557       0.948     339.16      0.287
T2         272.5565       2.880     333.66      0.327
S2         273.5555      62.333     228.70      0.313
R2         274.5547       4.436     289.14      0.313
K2         275.5555      17.361     229.67      0.327
2SM2       291.5555       4.455     112.37      0.271
muO3       327.5558       0.471     138.95      0.043
NO3        335.6558       0.698     308.77      0.055
MO3        345.5558       1.724     331.37      0.045
E3         345.6557       0.190     265.63      0.042
2MP3       347.5556       0.243     335.68      0.043
M3         355.5557       0.737     275.35      0.042
SO3        363.5558       1.411       1.52      0.048
MS3        364.5557       0.134     357.03      0.046
MK3        365.5556       1.699      11.33      0.047
SP3        381.5558       0.623      24.63      0.058
S3         382.5557       0.154      93.89      0.058
SK3        383.5556       1.272      47.07      0.061
4M2S4      419.5555       0.141      95.70      0.053
2MNS4      427.6555       0.328     309.17      0.053
2MnuS4     429.4555       0.145     289.51      0.053
N4         435.7555       0.693     245.64      0.052
3MS4       437.5555       0.837     308.89      0.051
MN4        445.6555       2.999     259.62      0.063
Mnu4       447.4555       0.539     242.19      0.064
2MSK4      453.5555       0.587     351.87      0.067
MA4        454.5555       0.782     156.92      0.067
M4         455.5555       7.454     268.50      0.064
MB4        456.5555       0.927      54.45      0.065
2MKS4      457.5555       0.323     309.50      0.065
SN4        463.6555       1.199     320.71      0.071
ML4        465.4557       0.509     241.81      0.072
MT4        472.5565       0.359     110.76      0.098
MS4        473.5555       7.041     304.59      0.097
MR4        474.5547       0.945      17.35      0.098
MK4        475.5555       2.164     304.89      0.103
S4         491.5555       1.597     354.41      0.068
SK4        493.5555       0.960     351.96      0.072
2MO5       545.5558       0.522     333.44      0.023
M5         555.5557       0.228     355.06      0.037
2MP5       563.5558       0.818      19.29      0.031
2MK5       565.5556       0.969       5.47      0.031
MSP5       581.5558       0.339      79.02      0.038
MSK5       583.5556       0.689      67.50      0.037
S5         5A0.5555       0.155     297.68      0.035
4MS6       637.5555       0.332      53.36      0.050
2MN6       645.6555       1.670     286.98      0.042
2Mn6       647.4555       0.509     277.25      0.044
M6         655.5555       2.826     296.21      0.064
MSN6       663.6555       0.901     323.04      0.050
MNK6       665.6555       0.365     320.01      0.052
2MS6       673.5555       3.649     328.05      0.081
2MK6       675.5555       0.919     336.63      0.088
2SN6       681.6555       0.212     160.68      0.037
3MSN6      683.4555       0.813     157.32      0.037
2SM6       691.5555       1.001       4.60      0.044
MSK6       693.5555       0.622       9.60      0.047
3MN8       845.6555       0.360     311.57      0.022
M8         855.5555       0.443     326.27      0.021
3MS8       873.5555       0.991     353.75      0.039
3MK8       875.5555       0.243      15.23      0.042
2(MS)8     891.5555       0.585      32.92      0.026
2MSK8      893.5555       0.317      38.56      0.027
4MN10      A45.6555       0.221     346.97      0.016
M10        A55.5555       0.199       9.00      0.016
3MSN10     A63.6555       0.416      18.36      0.021
4MS10      A73.5555       0.595      27.32      0.025
4MK10      A75.5555       0.118      38.08      0.026
3M2S10     A91.5555       0.471      62.71      0.023
