# Supplementary material for: Technical note: On seasonal variability of the M 2 tide
Source: Copernicus journal article supplement (doi:10.5194/os-18-1073-2022), 2022-07-19
Supplement: Supplementary file 2 [file os-18-1073-2022-supplement.zip › supplement/harmonics_PortOrford.txt]

Tide     Doodson no.    Amp (cm)   Phase_lag   std err (cm)
Sa         056.5555       9.276     271.93      0.836
Ssa        057.5555       2.917     256.46      0.526
Mf         075.5555       1.643     159.64      0.604
Mt         085.4555       0.389     194.49      0.187
2Q1        125.7558       0.536     205.93      0.026
sig1       127.5558       0.635     208.96      0.026
Q1         135.6558       4.732     206.82      0.022
rho1       137.4558       0.937     206.19      0.022
O1         145.5558      26.475     214.80      0.024
tau1       147.5556       0.210     196.45      0.022
M1         155.6556       2.131     222.73      0.020
chi1       157.4556       0.396     227.92      0.022
pi1        162.5568       0.843     232.12      0.022
P1         163.5558      13.289     227.29      0.022
S1         164.5557       1.317       7.50      0.022
K1         165.5556      42.803     231.19      0.022
psi1       166.5546       0.158     174.31      0.022
phi1       167.5556       0.485     220.81      0.022
the1       173.6556       0.452     240.67      0.022
J1         175.4556       2.534     244.35      0.022
SO1        183.5556       0.462     269.48      0.022
OO1        185.5556       1.432     262.94      0.019
ups1       195.4556       0.197     292.51      0.020
eps2       227.6555       0.260     156.60      0.008
2N2        235.7555       1.840     164.77      0.009
mu2        237.5555       1.606     161.33      0.011
N2'        245.5556       0.110     129.53      0.011
N2         245.6555      15.784     190.93      0.011
nu2        247.4555       3.102     196.06      0.014
Gam2       253.7557       0.235     218.11      0.043
alp2       254.5567       0.270     198.29      0.043
M2         255.5555      74.695     216.48      0.042
bet2       256.5545       0.188     205.38      0.042
del2       257.5555       0.081     199.39      0.032
lam2       263.6557       0.473     240.94      0.021
L2         265.4557       1.599     237.79      0.019
L2'        265.5558       0.273     341.84      0.020
T2         272.5565       1.155     236.67      0.022
S2         273.5555      19.706     239.30      0.022
K2         275.5555       5.356     231.38      0.022
eta2       285.4555       0.361     236.42      0.009
2SM2       291.5555       0.086      19.92      0.008
E3         345.6557       0.076     346.79      0.013
M3         355.5557       0.129     345.63      0.010
SO3        363.5558       0.083     279.77      0.011
MK3        365.5556       0.072     243.27      0.011
F3         375.5557       0.040     300.48      0.013
SP3        381.5558       0.118      14.78      0.011
S3         382.5557       0.096      21.42      0.011
SK3        383.5556       0.158       3.71      0.011
MN4        445.6555       0.044     171.84      0.011
M4         455.5555       0.133     211.13      0.010
MS4        473.5555       0.076     285.90      0.012
T4         490.5555       0.117     204.34      0.009
S4         491.5555       0.115     351.11      0.009
R4         492.5555       0.087       5.40      0.009
2MK5       565.5556       0.056     142.95      0.010
S5         5A0.5555       0.082     158.95      0.016
M6         655.5555       0.073      30.11      0.009
