# Supplementary material for: Technical note: On seasonal variability of the M 2 tide
Source: Copernicus journal article supplement (doi:10.5194/os-18-1073-2022), 2022-07-19
Supplement: Supplementary file 2 [file os-18-1073-2022-supplement.zip › supplement/harmonics_SaintMalo.txt]

Tide     Doodson no.    Amp (cm)   Phase_lag   std err (cm)
Sa         056.5555       5.885     212.99      0.510
Ssa        057.5555       1.989     119.53      0.537
Mm         065.4555       1.710     214.49      0.507
MSf        073.5555       1.716     238.46      0.390
Mf         075.5555       1.460     198.67      0.436
Mt         085.4555       0.339     238.12      0.153
2Q1        125.7558       0.372     251.34      0.058
sig1       127.5558       0.445     287.15      0.062
Q1         135.6558       2.347     302.72      0.075
rho1       137.4558       0.413     304.48      0.076
O1         145.5558       8.188     344.20      0.069
tau1       147.5556       0.512     153.59      0.066
M1'        155.5557       0.953     288.34      0.061
M1         155.6556       0.236      75.26      0.057
pi1        162.5568       0.364      75.02      0.068
P1         163.5558       3.495      87.43      0.068
S1         164.5557       0.944      55.93      0.064
K1         165.5556       9.495      95.25      0.066
psi1       166.5546       0.150      92.80      0.065
J1         175.4556       0.495     171.28      0.058
SO1        183.5556       0.453     239.50      0.052
OO1        185.5556       0.364     244.65      0.044
2MN2S2     209.6555       1.048     304.73      0.117
3MKS2      217.5555       1.667     327.70      0.117
2NS2       217.7555       0.875     173.72      0.117
3MS2       219.5555       2.886     324.95      0.117
MNK2       225.6555       1.850     206.96      0.115
eps2       227.6555       6.120     183.19      0.117
MnuS2      229.4555       2.500     177.43      0.117
2MK2       235.5555       5.388     227.62      0.160
2N2        235.7555       9.521     144.61      0.163
mu2        237.5555      25.693     197.17      0.163
SNK2       243.6555       0.397     333.59      0.117
NA2        244.6555       1.149      92.50      0.117
N2         245.6555      71.632     161.32      0.117
nu2        247.4555      12.525     144.45      0.127
MSK2       253.5555       3.734     277.58      0.155
Gam2       253.7557       1.582     158.00      0.159
MA2        254.5555       3.027      99.92      0.154
M2         255.5555     367.377     177.47      0.150
MB2        256.5555       1.837     206.26      0.149
MKS2       257.5555       3.281     271.80      0.131
lam2       263.6557       9.411     139.04      0.301
L2         265.4557      16.848     157.33      0.293
L2'        265.5558       1.695       0.58      0.298
T2         272.5565       7.757     214.63      0.150
S2         273.5555     143.700     227.86      0.155
R2         274.5547       1.445     258.83      0.155
K2         275.5555      40.945     225.33      0.148
MSnu2      281.6555       0.708     106.70      0.117
MSN2       283.4555       6.223      11.68      0.117
xi2        283.6555       0.273     191.89      0.108
eta2       285.4555       2.017     294.02      0.108
2SM2       291.5555       8.153      34.28      0.156
SKM2       293.5555       4.284      26.74      0.155
2Snu2      2Az.6555       0.448      43.59      0.117
2SN2       2A1.4555       0.666     130.66      0.117
SKN2       2A3.4555       0.525      93.34      0.117
3S2M2      2Bz.5555       1.111     244.69      0.117
2SK2M2     2B1.5555       0.939     245.78      0.117
NO3        335.6558       0.440      79.40      0.026
MO3        345.5558       1.107     115.21      0.029
E3         345.6557       0.698     155.40      0.029
2MP3       347.5556       0.151      31.21      0.031
M3         355.5557       3.083     170.46      0.026
NK3        355.6555       0.383     128.09      0.026
SO3        363.5558       0.754     183.14      0.032
MK3        365.5556       1.623     224.41      0.033
F3         375.5557       0.389     218.26      0.029
SP3        381.5558       0.855     249.53      0.035
S3         382.5557       0.226     329.40      0.036
SK3        383.5556       1.224     272.22      0.036
4MS4       419.5555       0.518      59.56      0.060
2MNK4      425.6555       0.513     312.22      0.047
2MNS4      427.6555       1.750     297.82      0.047
2MnS4      429.4555       0.659     277.28      0.047
3MK4       435.5555       0.888     340.25      0.047
N4         435.7555       2.058     233.72      0.047
3MS4       437.5555       3.791     309.92      0.048
MN4        445.6555       9.906     256.15      0.047
Mnu4       447.4555       1.914     227.19      0.047
2MSK4      453.5555       1.009      42.41      0.048
MA4        454.5555       0.400     196.15      0.047
M4         455.5555      26.362     279.04      0.050
MB4        456.5555       0.133     345.91      0.050
2MKS4      457.5555       0.953      19.78      0.051
SN4        463.6555       3.410     345.74      0.062
3MN4       465.4555       2.691      69.85      0.062
NK4        465.6555       1.359     325.91      0.062
2SMK4      055.5555       0.146     130.90      0.046
MT4        472.5565       1.037     315.77      0.047
MS4        473.5555      19.619     336.27      0.047
MR4        474.5547       0.260      33.95      0.047
MK4        475.5555       5.665     335.24      0.046
2SNM4      481.6555       0.739     147.52      0.050
2MSN4      483.4555       2.308     138.95      0.048
2MKN4      485.4555       0.451     104.79      0.049
T4         490.5555       0.279     151.99      0.047
S4         491.5555       2.792      63.42      0.047
R4         492.5555       0.147     121.48      0.047
SK4        493.5555       1.643      56.59      0.045
3SM4       4Bz.5555       0.143     264.28      0.047
2MO5       545.5558       0.064     206.12      0.021
M5         555.5557       0.255     325.94      0.015
2MK5       565.5556       0.189     316.32      0.017
S5         5A0.5555       0.132       5.93      0.018
2NM6       635.7555       0.411     279.26      0.018
4MS6       637.5555       0.206     217.19      0.018
2MN6       645.6555       1.270     309.51      0.021
2Mn6       647.4555       0.331     332.07      0.021
M6         655.5555       2.180     340.52      0.013
MSN6       663.6555       0.648     356.18      0.018
4MN6       665.4555       0.196     203.10      0.019
MNK6       665.6555       0.262       5.06      0.018
MKnu6      667.4555       0.093      40.05      0.018
2MT6       672.5565       0.102      35.15      0.015
2MS6       673.5555       2.055      35.92      0.014
2MK6       675.5555       0.618      37.03      0.013
MSL6       683.4557       0.324      87.50      0.016
2SM6       691.5555       0.496      74.44      0.014
MSK6       693.5555       0.294      78.12      0.013
3M2NS8     055.5555       0.086     278.32      0.018
4MNS8      055.5555       0.192     292.74      0.019
2(MN)8     835.7555       0.160     207.30      0.018
5MS8       055.5555       0.210     301.36      0.018
3MN8       845.6555       0.432     236.63      0.018
3Mnu8      847.4555       0.180     174.47      0.018
M8         855.5555       0.628     269.49      0.018
2MSN8      863.6555       0.476     304.56      0.019
2MNK8      865.6555       0.146     290.29      0.021
3MS8       873.5555       0.998     313.09      0.019
3MK8       875.5555       0.269     315.23      0.018
2SMN8      055.5555       0.140      45.45      0.019
2MSL8      883.4557       0.323     296.23      0.021
MSNK8      883.6555       0.117      19.04      0.021
2(MS)8     891.5555       0.537      22.29      0.024
2MSK8      893.5555       0.307      14.75      0.022
4MN10      A45.6555       0.171     359.35      0.018
M10        A55.5555       0.131      18.28      0.018
4MS10      A73.5555       0.292      67.91      0.019
4MSN12     C63.6555       0.084     252.17      0.018
5MS12      C73.5555       0.108     261.76      0.017
4M2S12     C91.5555       0.087     312.53      0.014
