# Supplementary material for: Technical note: On seasonal variability of the M 2 tide
Source: Copernicus journal article supplement (doi:10.5194/os-18-1073-2022), 2022-07-19
Supplement: Supplementary file 2 [file os-18-1073-2022-supplement.zip › supplement/readme]

This directory contains tables of tidal harmonic constants
for the three example tide-gauge stations discussed in the main paper.
Each table is based on a single inversion of hourly data covering the 
following time spans:

Port Orford      Jan 1994 -- Aug 2021
Saint-Malo       Jan 2001 -- Dec 2019
Chittagong       Jan 2008 -- Dec 2018

Constituents with amplitudes smaller than twice their standard
error have been removed from the tables, as have most constituents
with amplitudes smaller than 0.5 mm.

It is possible that a small handful of compound tides with amplitudes
above the limit have been inadvertently omitted. This is most likely 
for Saint-Malo, where shallow-water effects generate a wealth of
nonlinear constituents. Spectra of tidal residuals (not shown) are
largest around the L2 group, probably because the coinciding tides
L2 and 2MN2 are both present, with different modulations, but they
are difficult to separate.

Note that constituents whose name includes a prime (')
are third-degree constituents.
